# Supplementary material for: Improving the Physical Health of Psychiatric Hospital Residents: An Evaluation of an Obesity Education Program for Mental Health Professionals
Source: MDPI journal article supplement (doi:10.3390/healthcare10101851), 2022-09-23

## Supplement File S2. Data Analysis by Item

### Bar Charts and Histograms for Participant Responses Pre- and Post-Test (n=50)

#### Item 1. Bar Charts for Responses

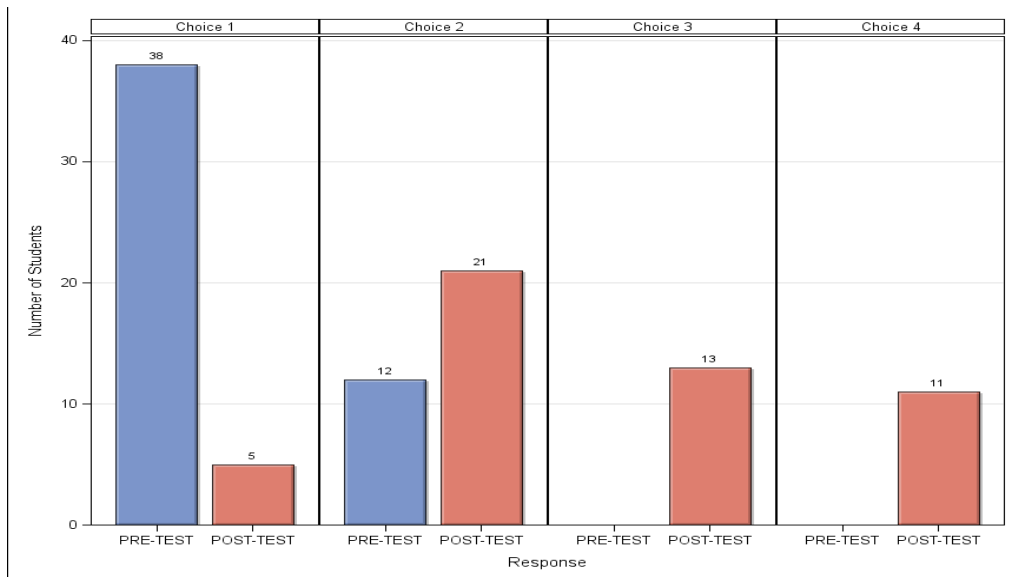

#### Item 2. Histogram of Responses

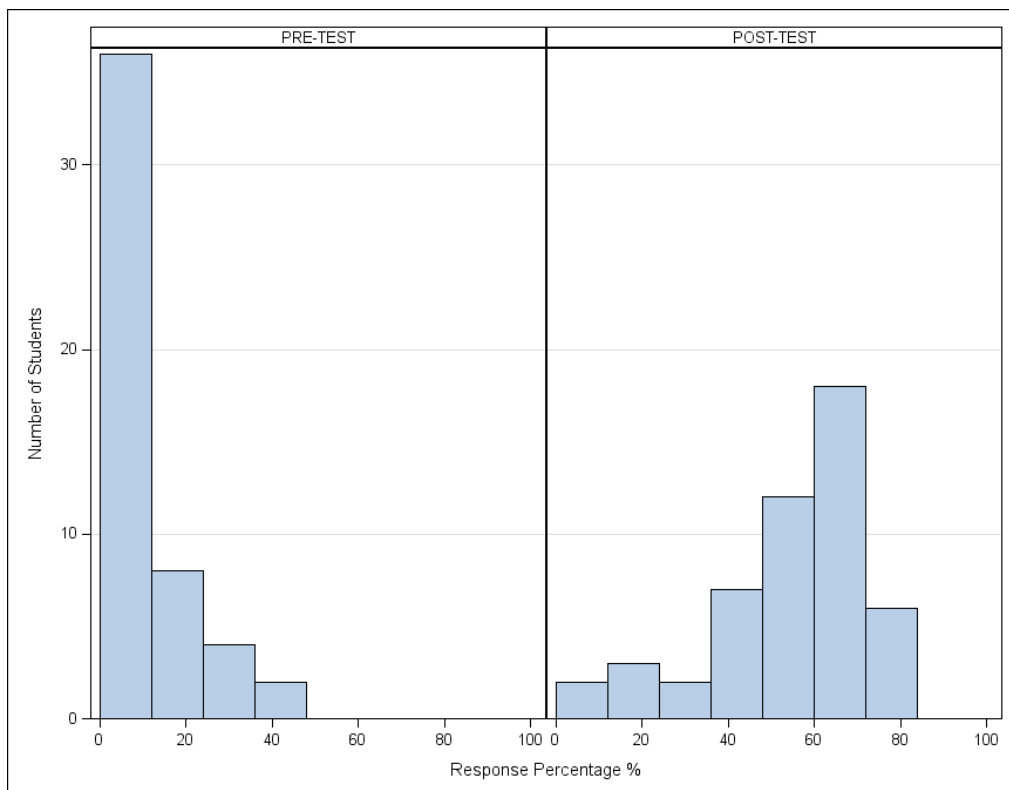

Item 3. Histogram of Responses

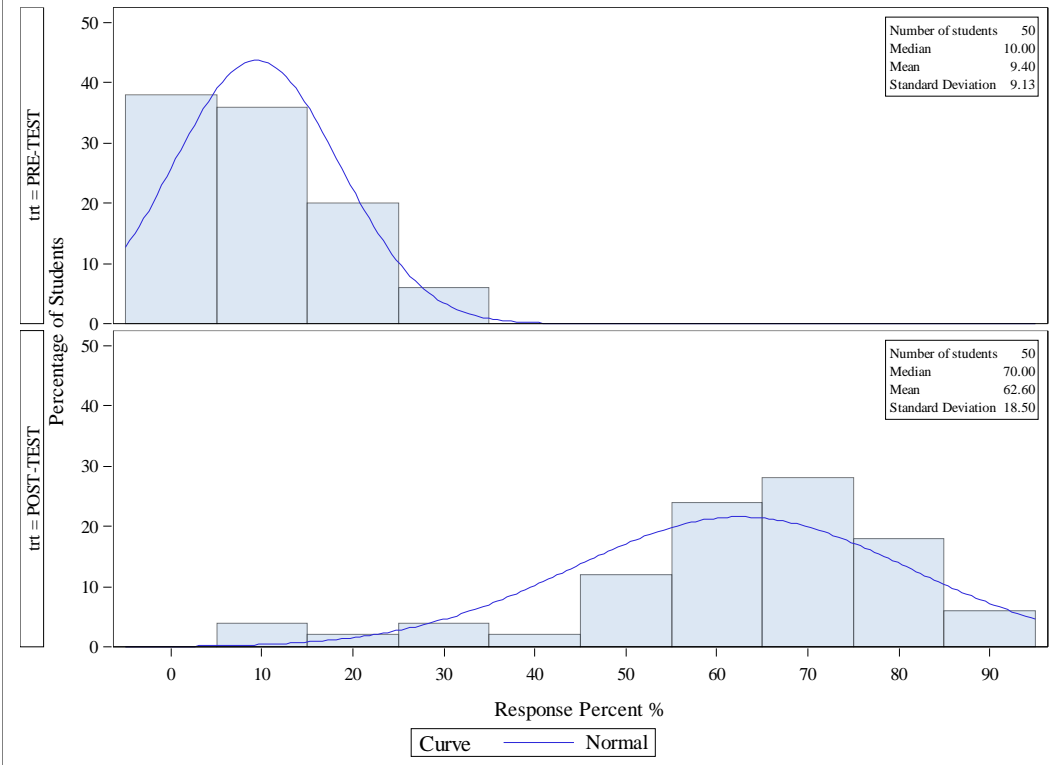

Item 4. Histogram of Responses

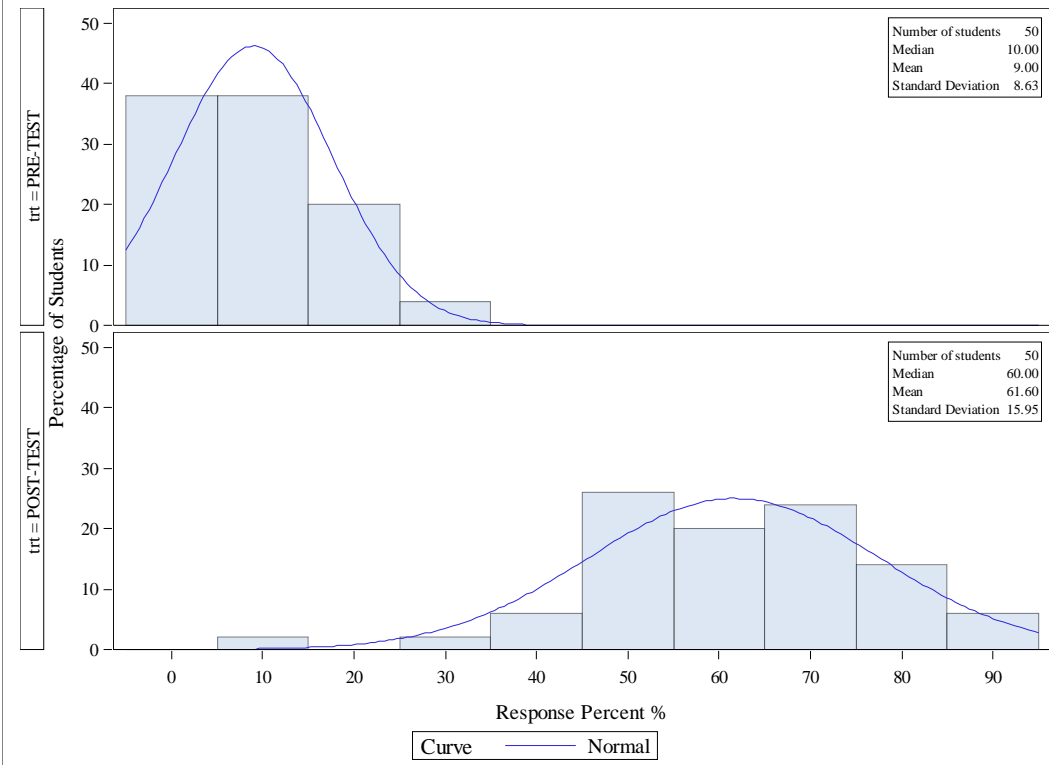

Item 5. Histogram of Responses

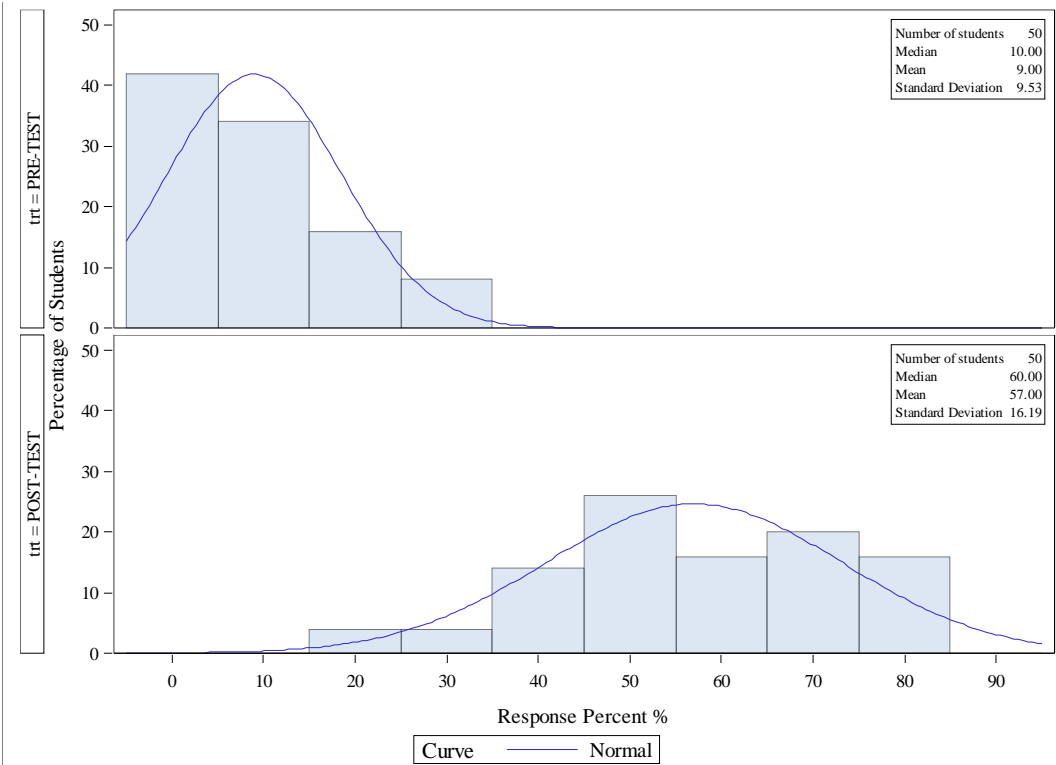

Item 6. Histogram of Responses

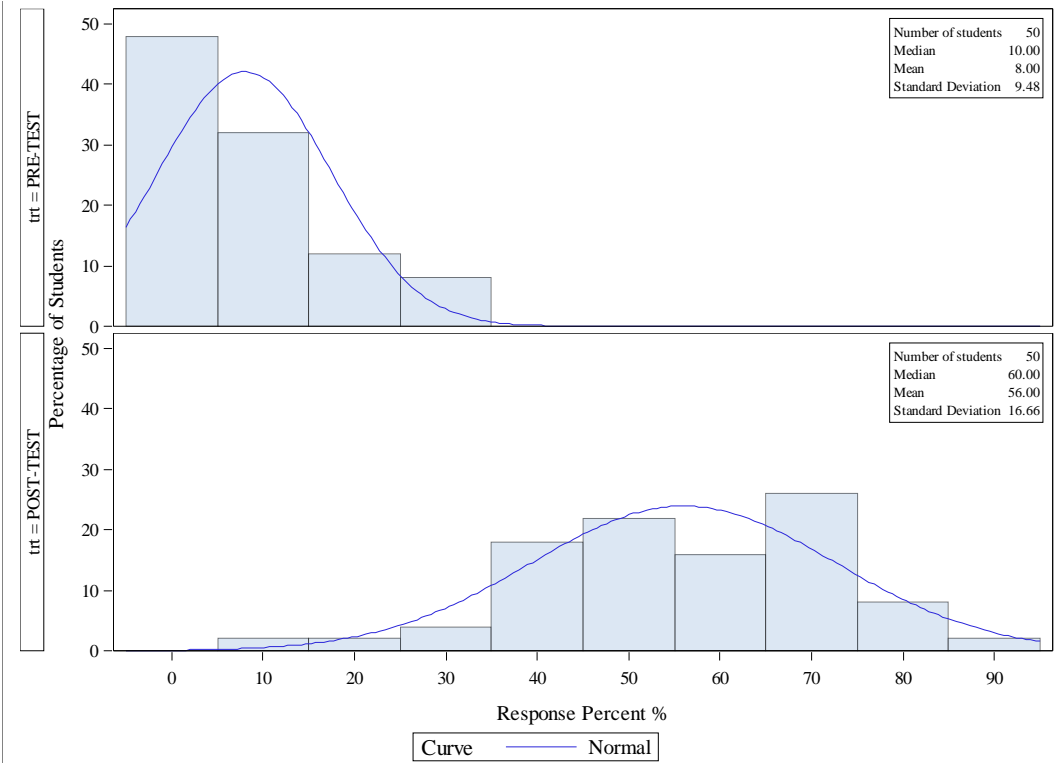

Item 7. Histogram of Responses

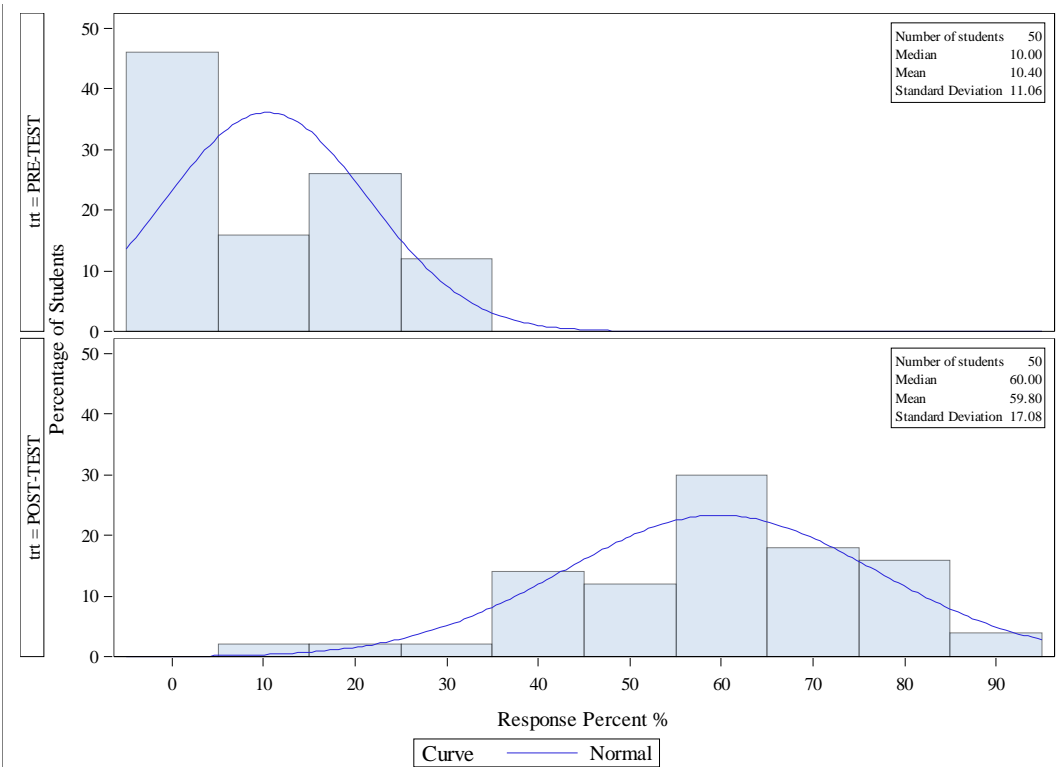

Item 8. Histogram of Responses

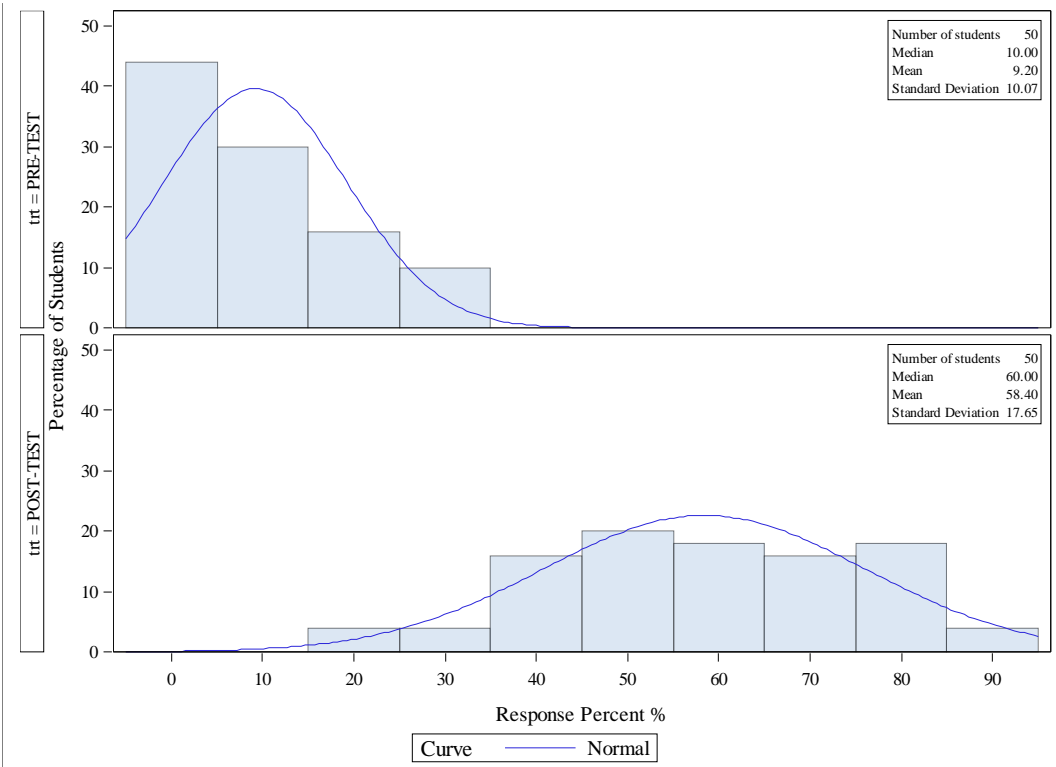

Item 9. Histogram of Responses

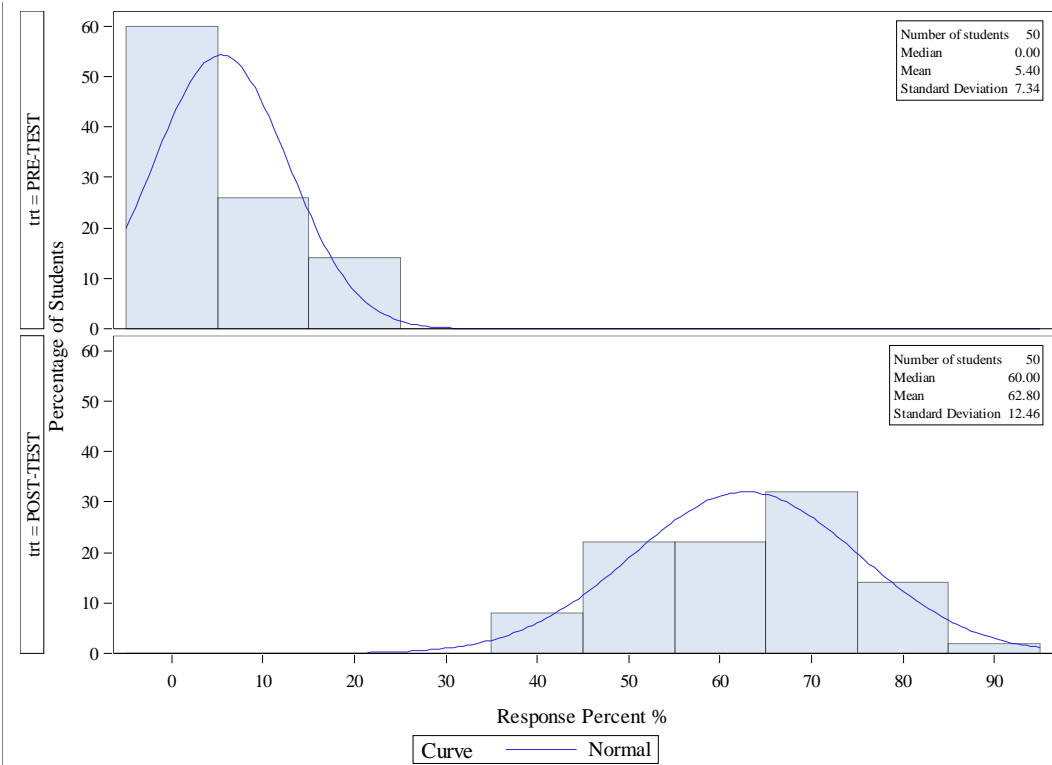

Item 10. Histogram of Responses

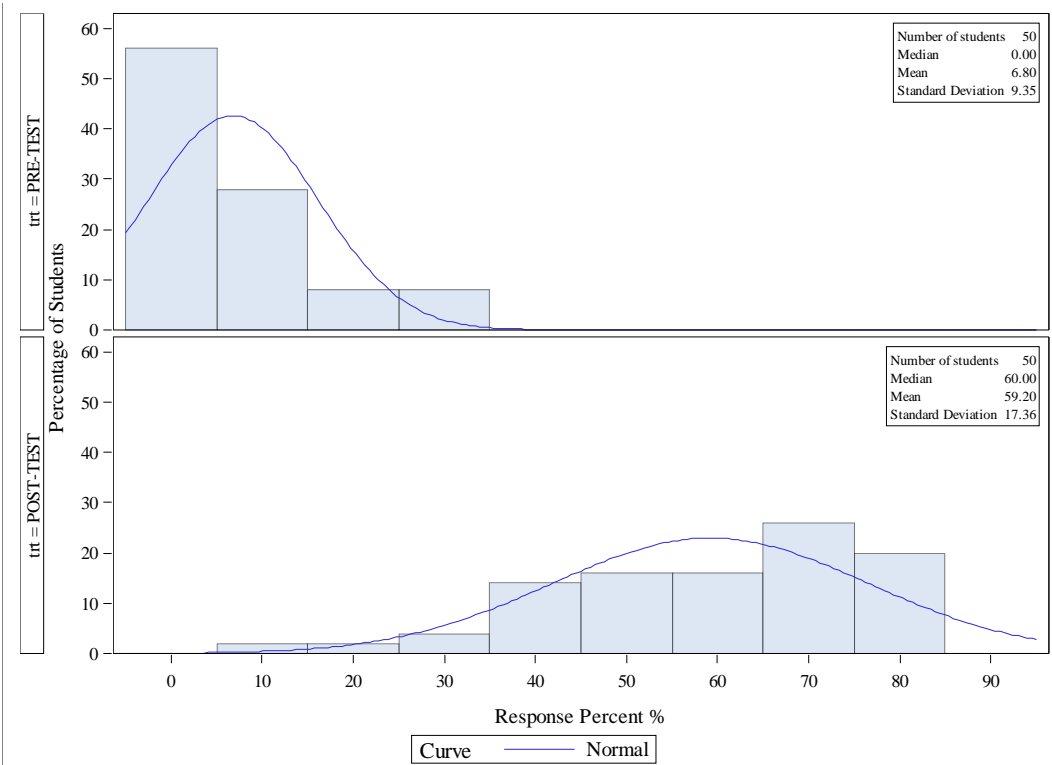

## Item 11. Histogram of Responses

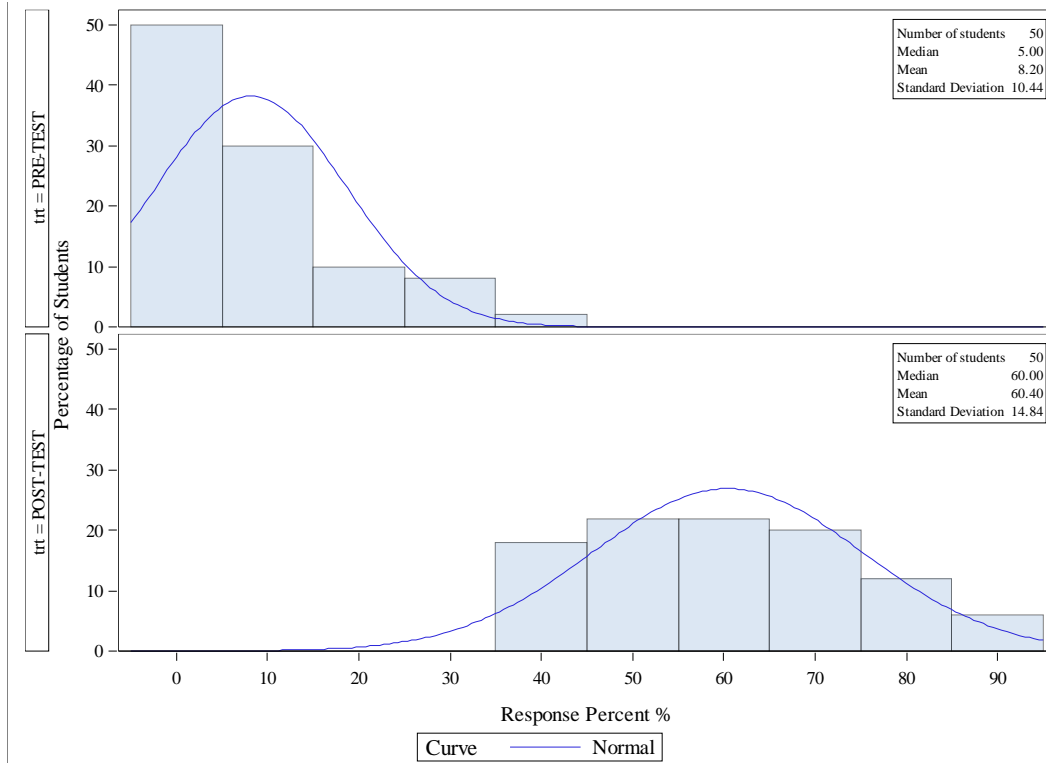

## Item 12 (a, b, c, d, e). Bar Charts for Responses

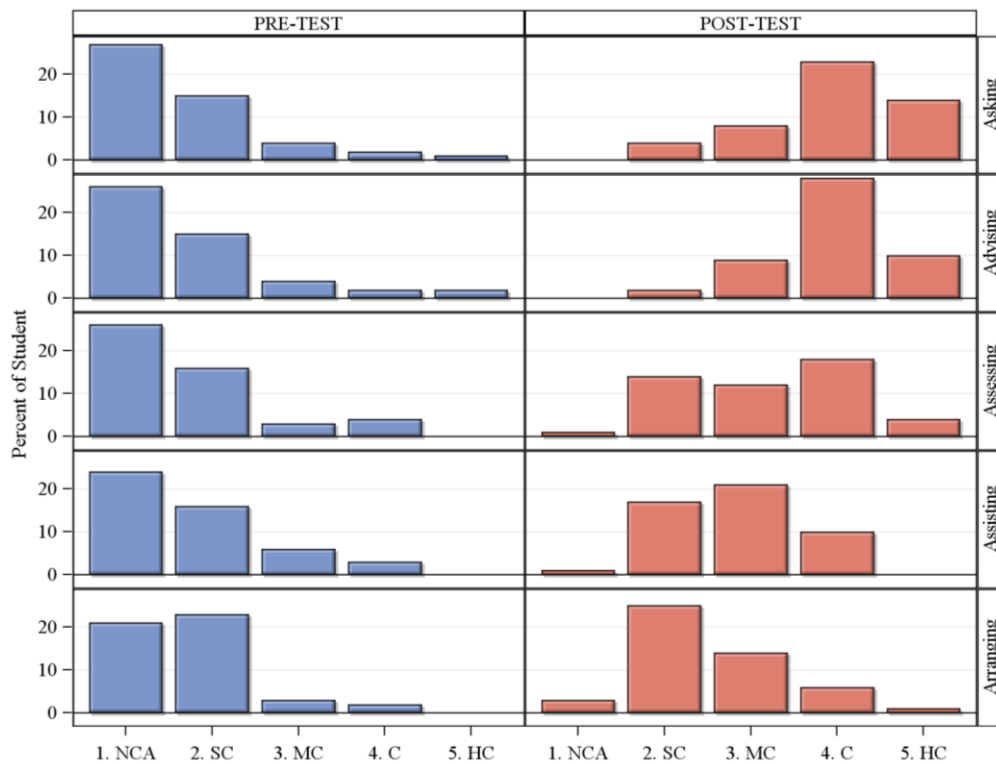

### Item 13 (a, b, c, d, e). Bar Charts for Responses

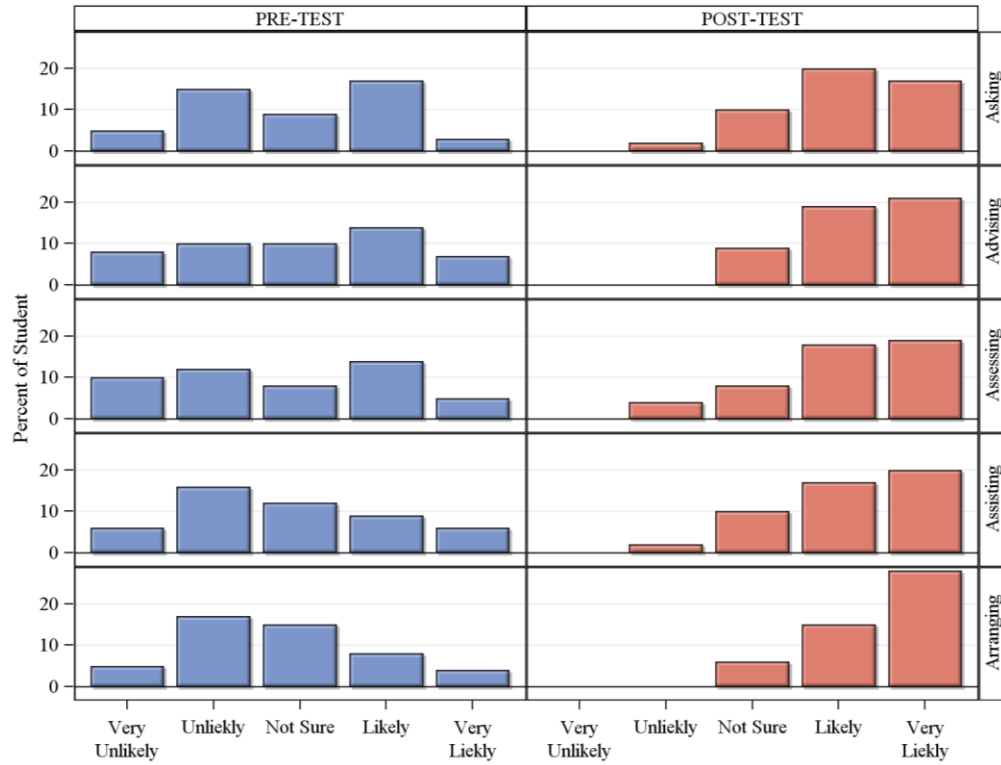

### Item 15. Bar Charts for Responses

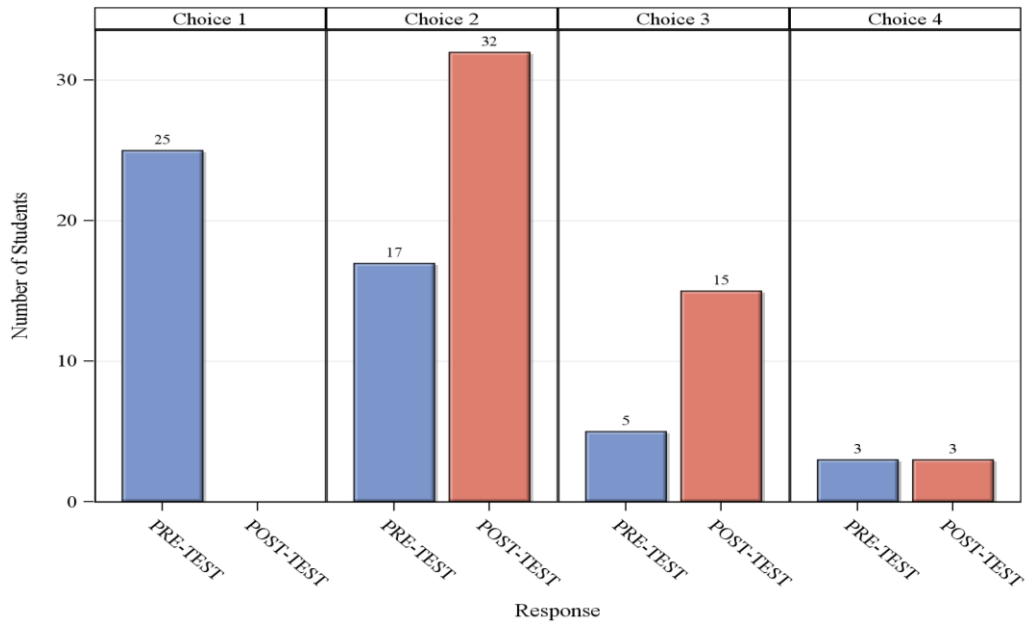

### Item 16. Bar Charts for Responses

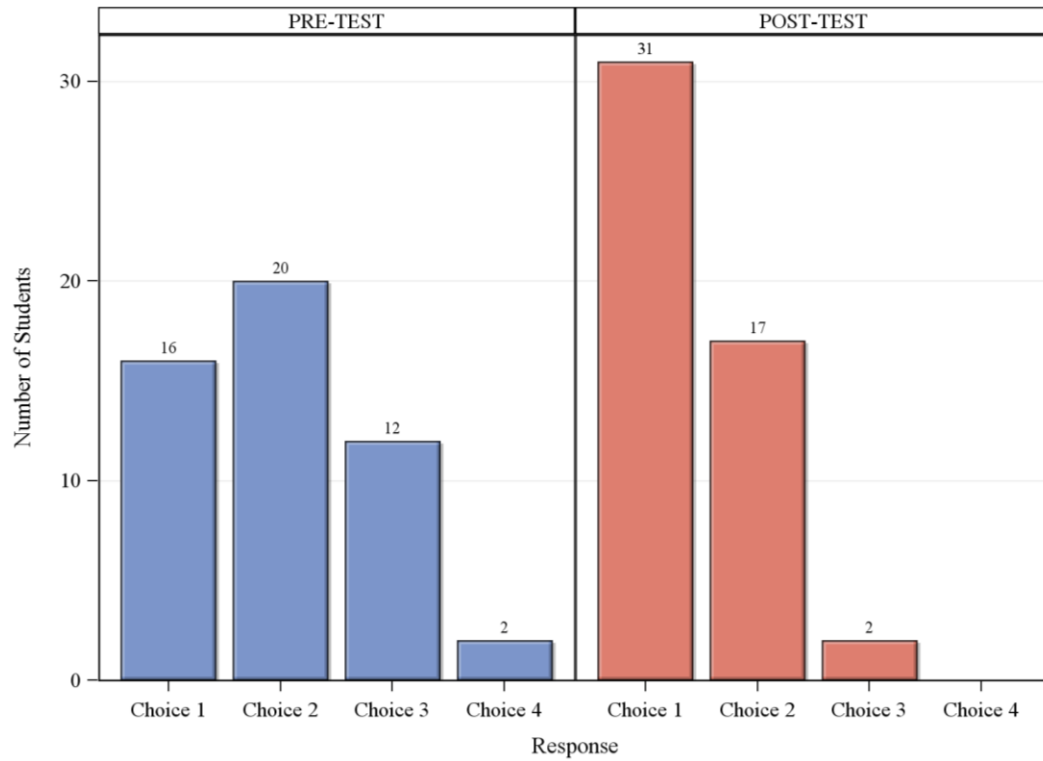

### Item 17. Bar Charts for Responses

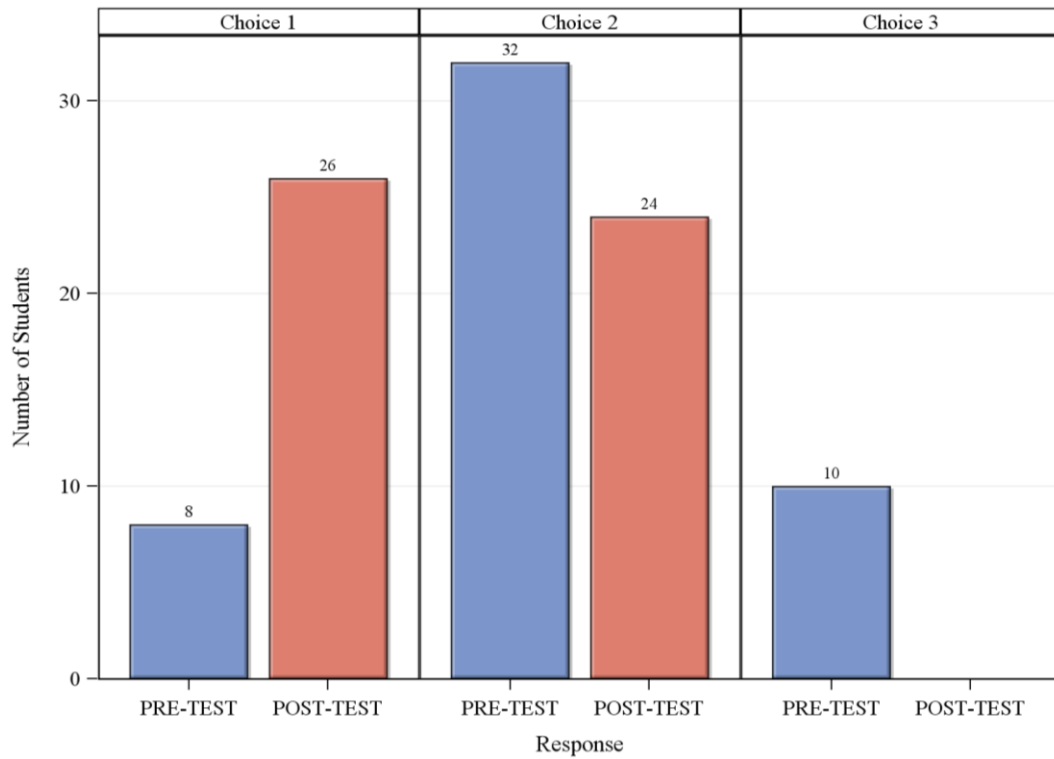

Supplement: s1 [file s1]
